# Supplementary material for: Multiple myeloma risk variant at 7p15.3 creates an IRF4-binding site and interferes with CDCA7L expression
Source: Nat Commun. 2016 Nov 24;7:13656. doi: 10.1038/ncomms13656 (PMC5123067; doi:10.1038/ncomms13656)
Supplement: Supplementary Information — Supplementary Figures 1-8, Supplementary Tables 1-4 and Supplementary References [file ncomms13656-s1.pdf]

### Supplementary Figure 1. eQTL boxplots.

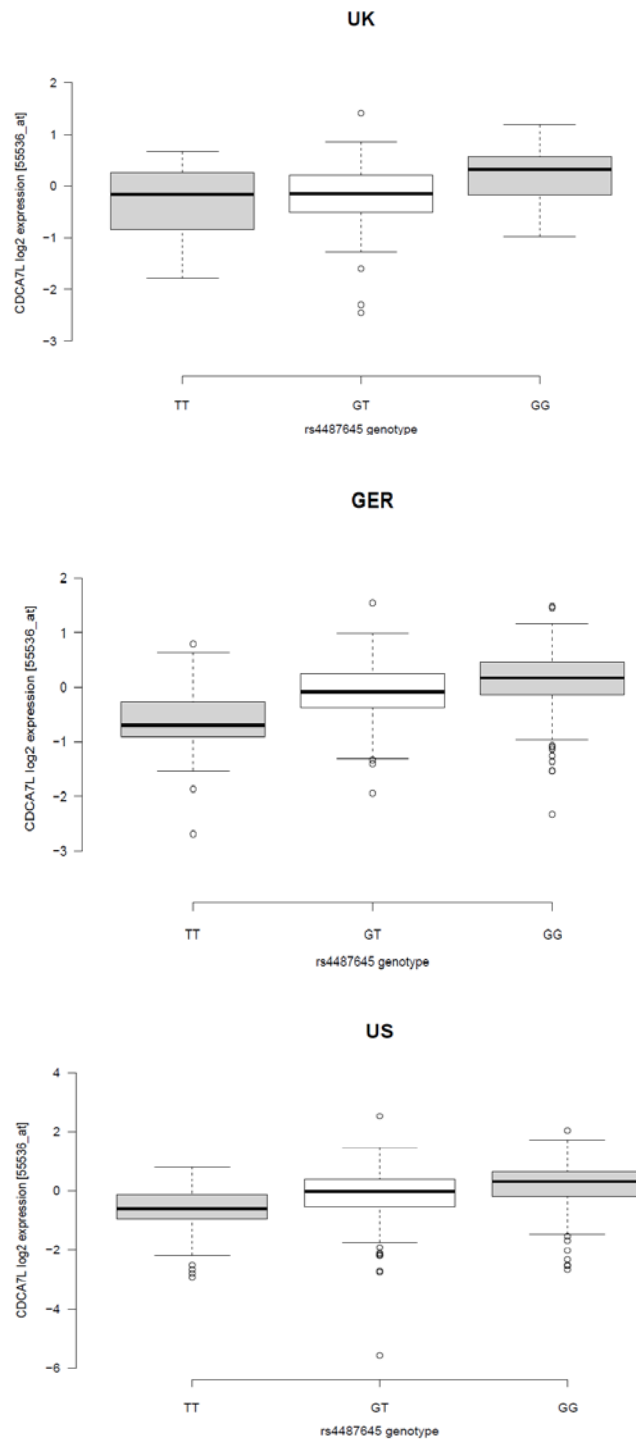

**Meta  $P = 1.95 \times 10^{-36}$**

Relationship between rs4487645 genotype and *CDCA7L* expression in CD138+ selected plasma cells from 658 German (GER) (E-MTAB-2299), 183 UK (GSE21349) and 608 US (GSE2658, GSE31161) MM patients. The central line in each box indicates the median; the bottom and top lines of the box are the 25th and 75th percentiles; whiskers extend 1.5 times from the 25th and 75<sup>th</sup> percentiles.

**Supplementary Figure 2. Expression correlation between *IRF4* and *CDCA7L* in MM.**

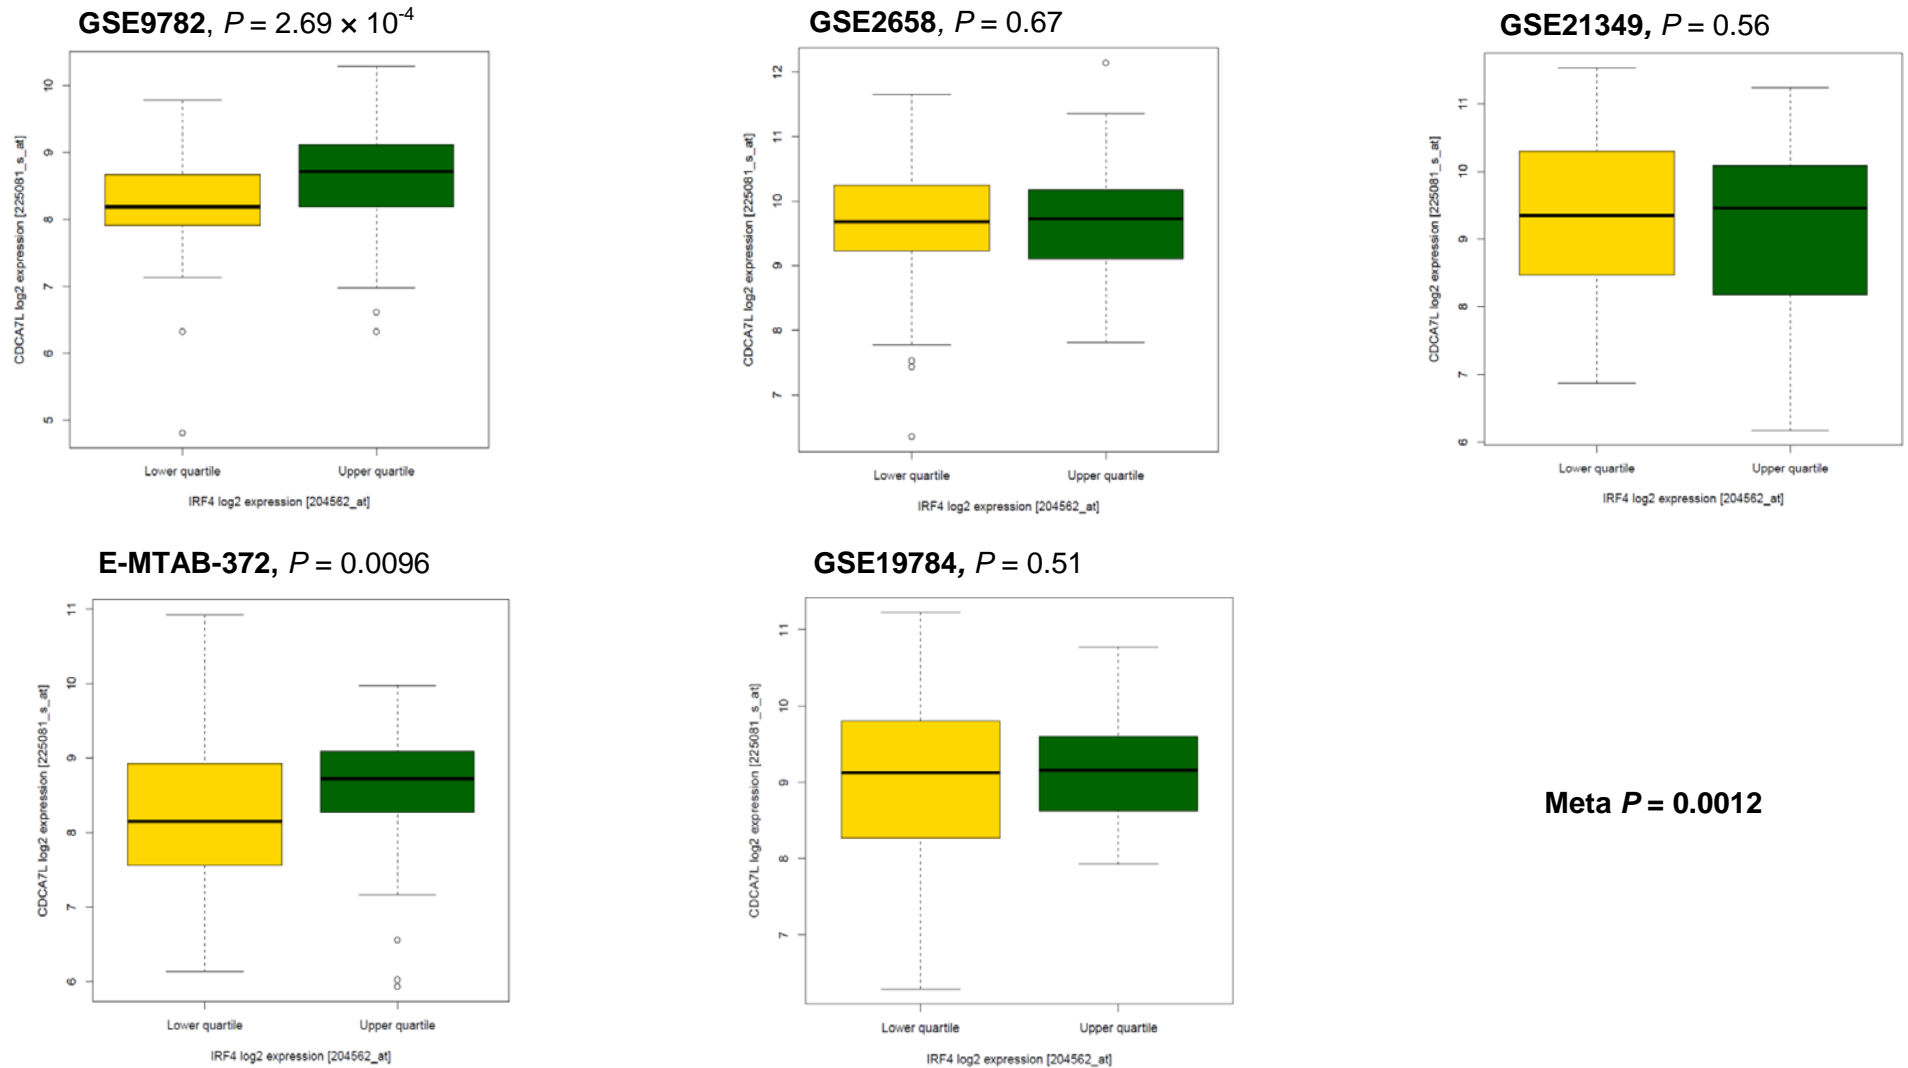

Relationship between differential *IRF4* expression (upper and lower quartiles) and *CDCA7L* expression in multiple myeloma expression datasets GSE9782, GSE2658, GSE19784, E-MTAB-372 and GSE21349. The central line in each box indicates the median; the bottom and top lines of the box are the 25th and 75th percentiles; whiskers extend 1.5 times from the 25th and 75th percentiles. Statistical analysis was performed with Mann-Whitney-Wilcoxon test.  $P$  values were combined from independent datasets combined using Fisher's Method.

**Supplementary Figure 3. *IRF4* knockdown reduces expression of *CDCA7L*.**

**a)**

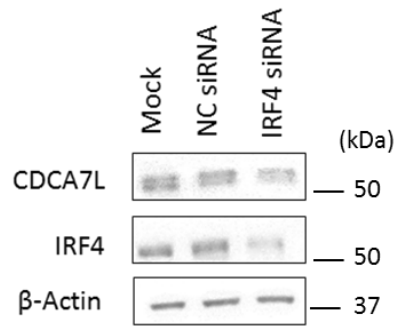

**b)**

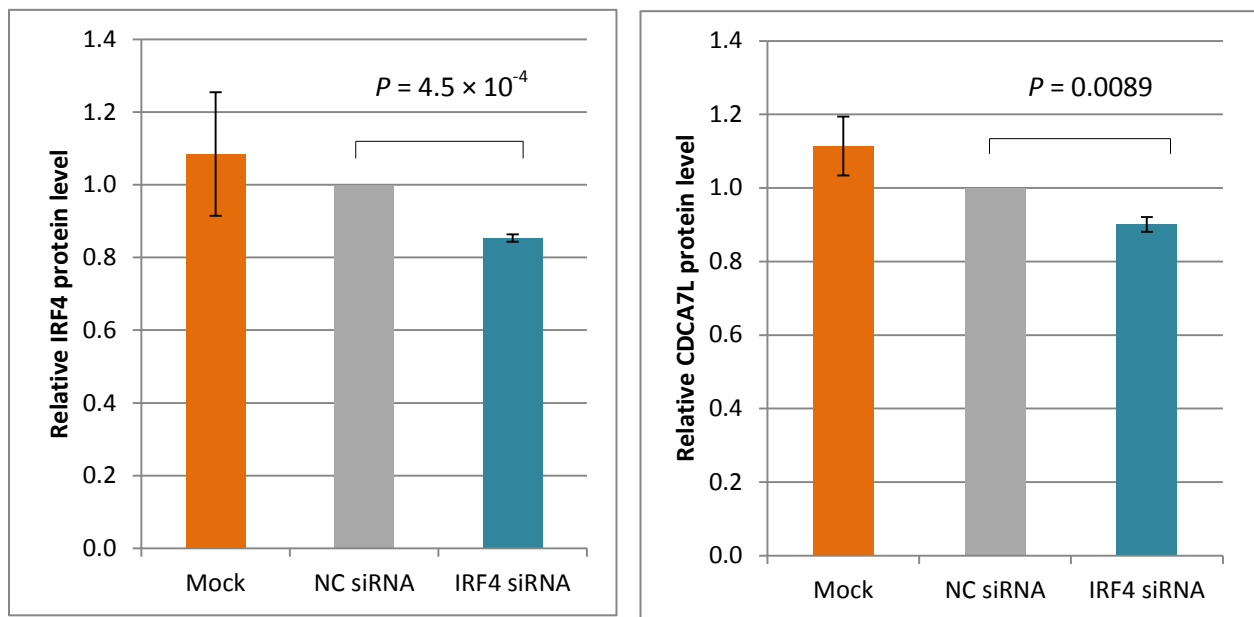

**a)** Representative Western blot analysis of IRF4 and CDCA7L protein level in KMS11 cells 24 h post-transfection with indicated siRNAs. **b)** Quantification of protein levels with ImageJ software in mock transfection and *IRF4* knockdown normalized to NC siRNA. Data shown are mean  $\pm$  SEM from three biological experiments and assessed by two-tailed *t*-test. The protein samples from the three biological replicates were derived and processed as one experiment, and the blots were generated and processed in parallel.

**Supplementary Figure 4. Expression correlation between *MYC* and *CDCA7L* in MM.**

**GSE9782,  $P = 0.097$**

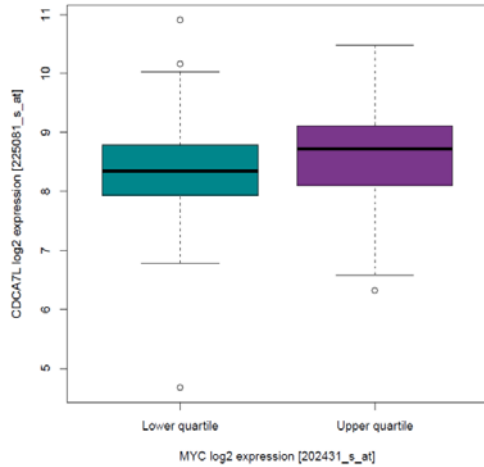

**GSE2658,  $P = 3.10 \times 10^{-4}$**

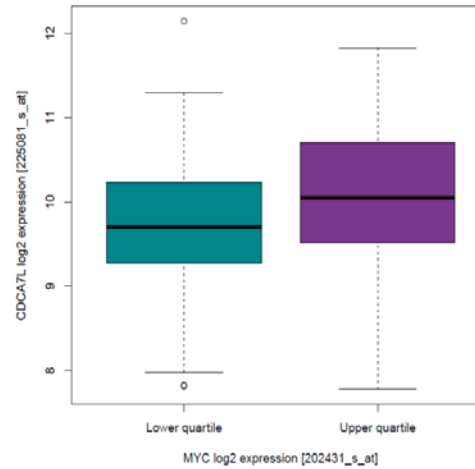

**GSE19784,  $P = 0.29$**

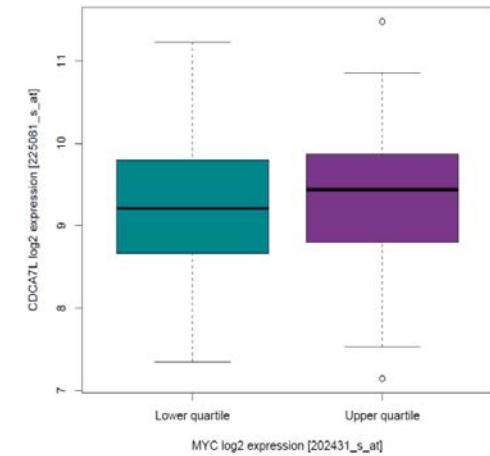

**E-MTAB-372,  $P = 0.0032$**

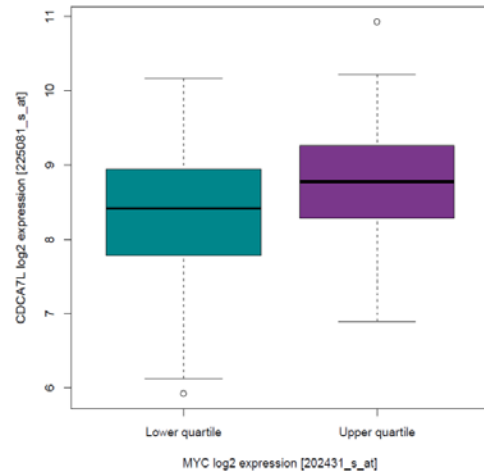

**GSE21349,  $P = 0.95$**

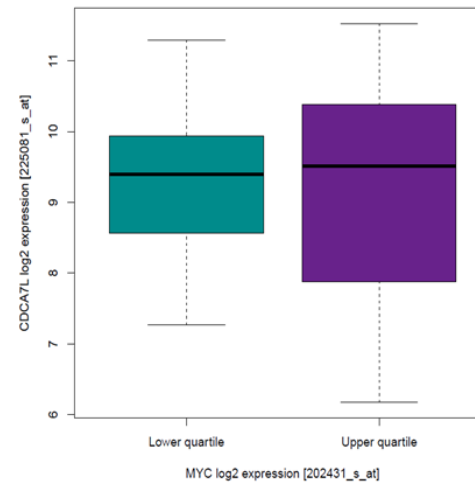

**Meta  $P = 1.32 \times 10^{-4}$**

Relationship between differential *MYC* expression (upper and lower quartiles) and *CDCA7L* expression in multiple myeloma expression datasets GSE9782, GSE2658, GSE19784, E-MTAB-372 and GSE21349. The central line in each box indicates the median; the bottom and top lines of the box are the 25th and 75th percentiles; whiskers extend 1.5 times from the 25th and 75th percentiles. Statistical analysis performed with Mann-Whitney-Wilcoxon test.  $P$  values from independent datasets were combined using Fisher's Method.

**Supplementary Figure 5. Relationship between a gene expression-based proliferation index and *CDCA7L* in MM patients.**

**a) GER**

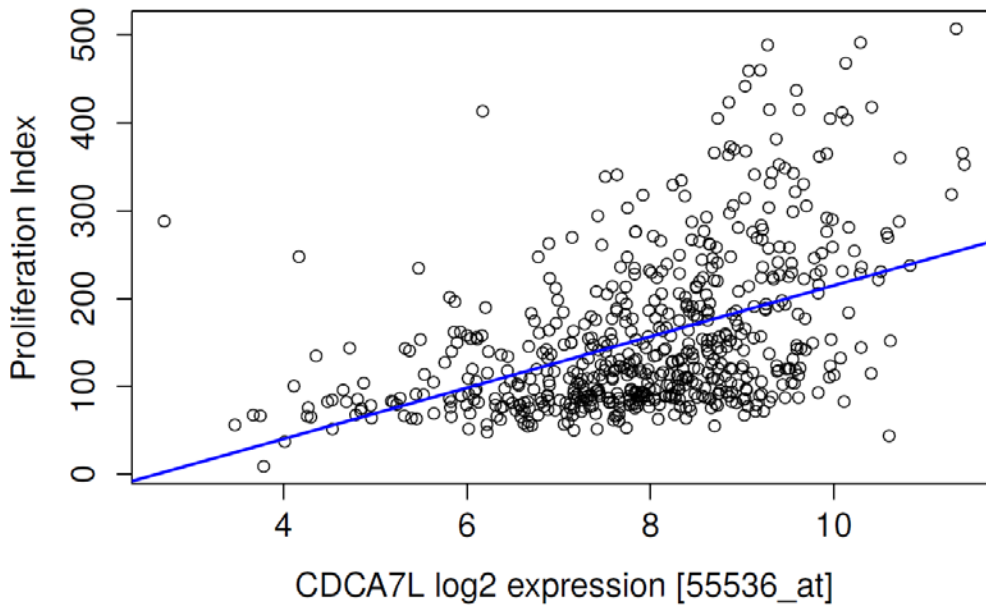

Pearson's product-moment correlation = 0.44,  $P < 1.0 \times 10^{-16}$

**b) US**

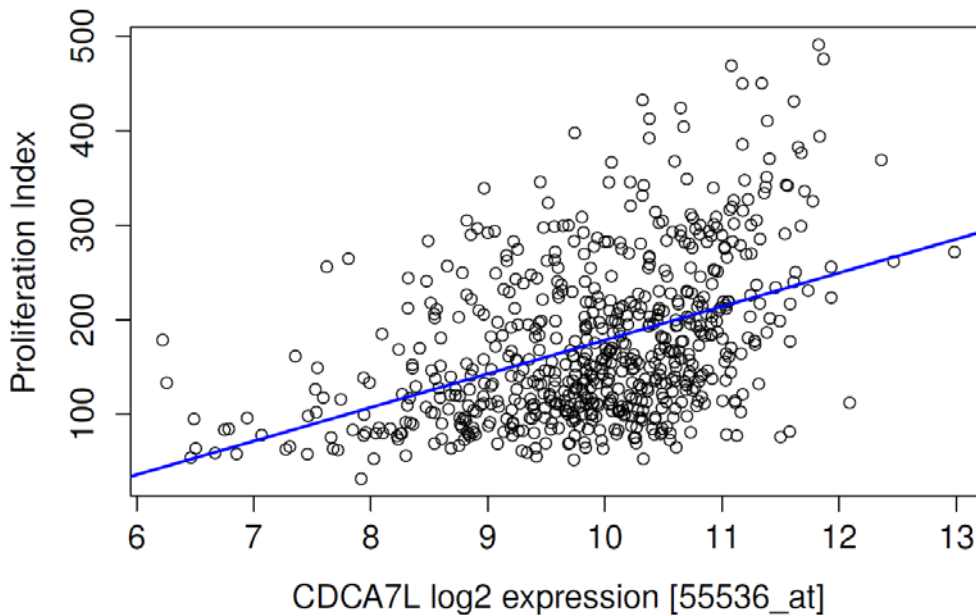

Pearson's product-moment correlation = 0.47,  $P < 1.0 \times 10^{-16}$

Correlation plot of *CDCA7L* expression and gene expression-based proliferation index (GPI)<sup>1</sup> of GC-RMA (robust multiarray averaging) normalized Affymetrix U133+2 array expression from CD138+ selected MM plasma cells from **a)** 658 German MM patients (E-MTAB-2299) and **b)** 608 US MM patients (GSE2658, GSE31161). Blue line represents a line of best fit.

**Supplementary Figure 6. *CDCA7L* knockdown in KMS11.**

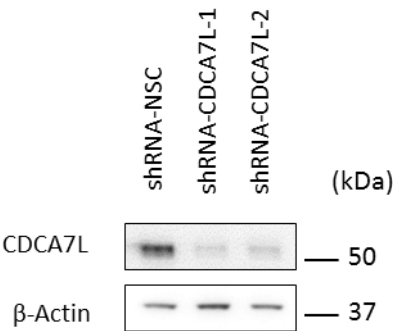

The knockdown efficiencies of shRNA-CDCA7L-1 and shRNA-CDCA7L-2 in KMS11 were determined by Western blotting 72 h after doxycycline was added to induce knockdown.  $\beta$ -actin was used as loading control. Representative Western blot shown below.

**Supplementary Figure 7. Impact of *CDCA7L* knockdown on cell cycle.**

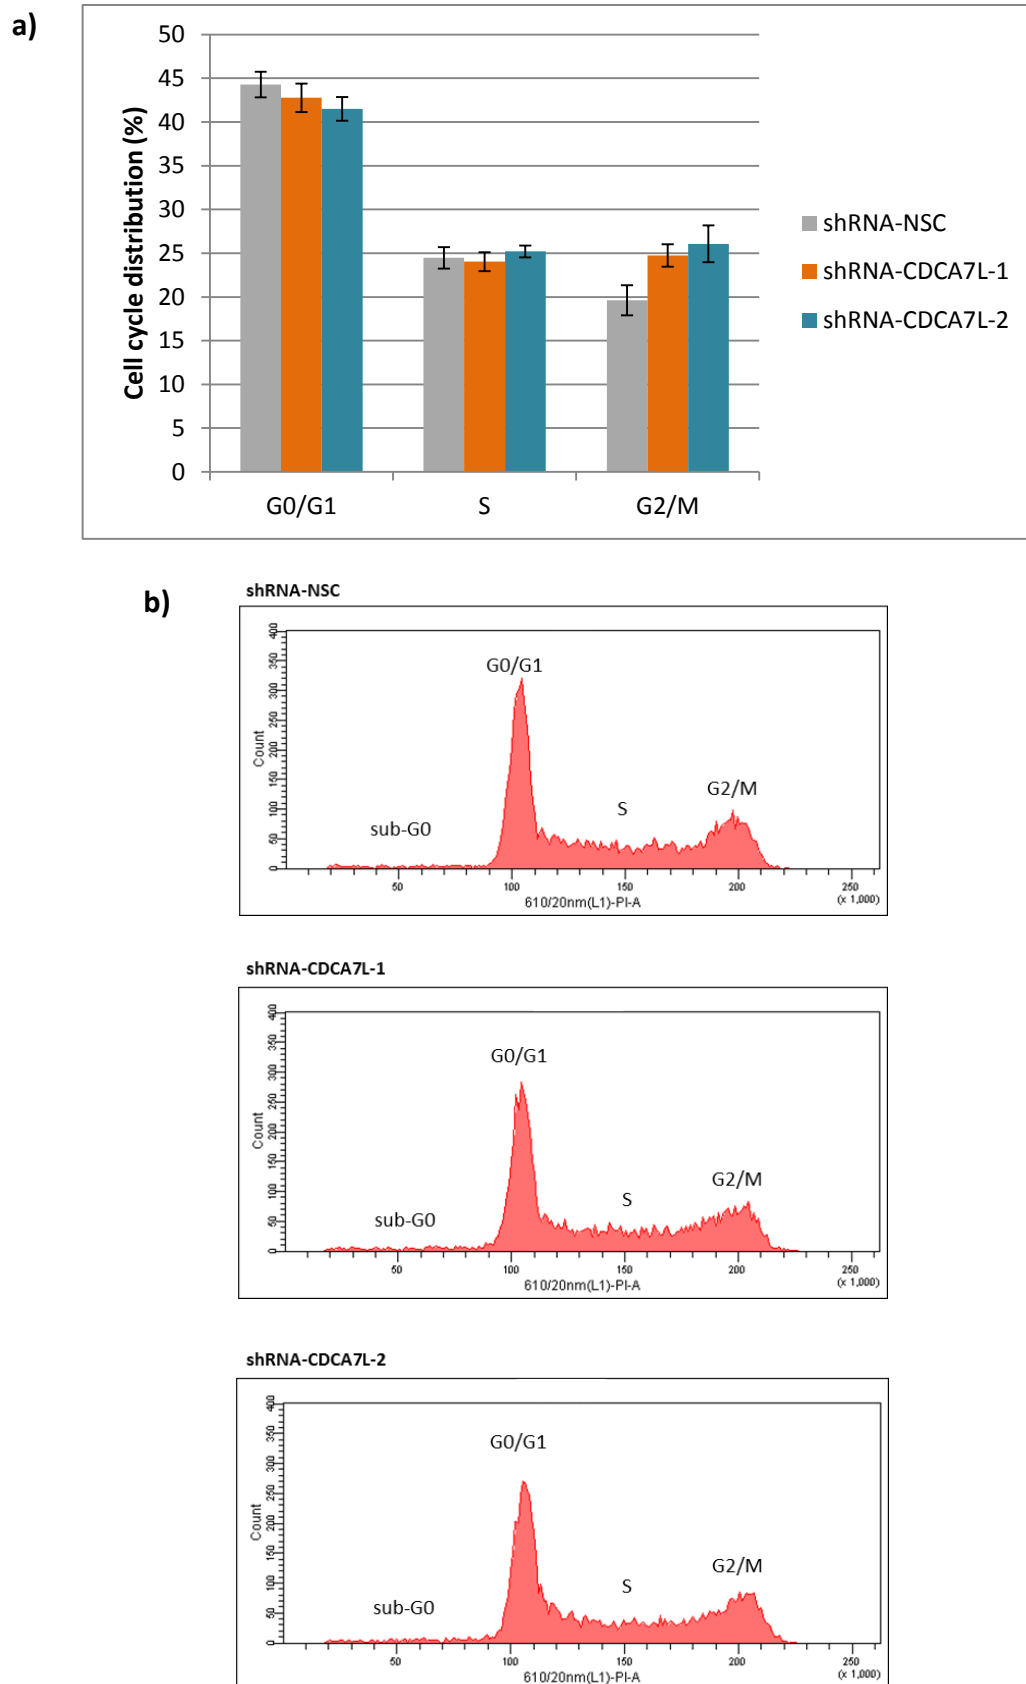

**a)** Cell cycle analysis by flow cytometry in transduced KMS11 with shRNA-CDCA7L-1, shRNA-CDCA7L-2 and shRNA-NSC 72 h after addition of doxycycline. Data shown are mean  $\pm$  SEM from three independent experiments performed in triplicates. Differences at each cell cycle stage (%) between *CDCA7L* and control knockdowns were assessed by two-tailed *t*-test. **b)** Representative panels of cell cycle distribution between shRNA-CDCA7L-1, shRNA-CDCA7L-2 and shRNA-NSC at 72 h.

**Supplementary Figure 8. Relationship between differential *CDCA7L* expression and patient overall survival.**

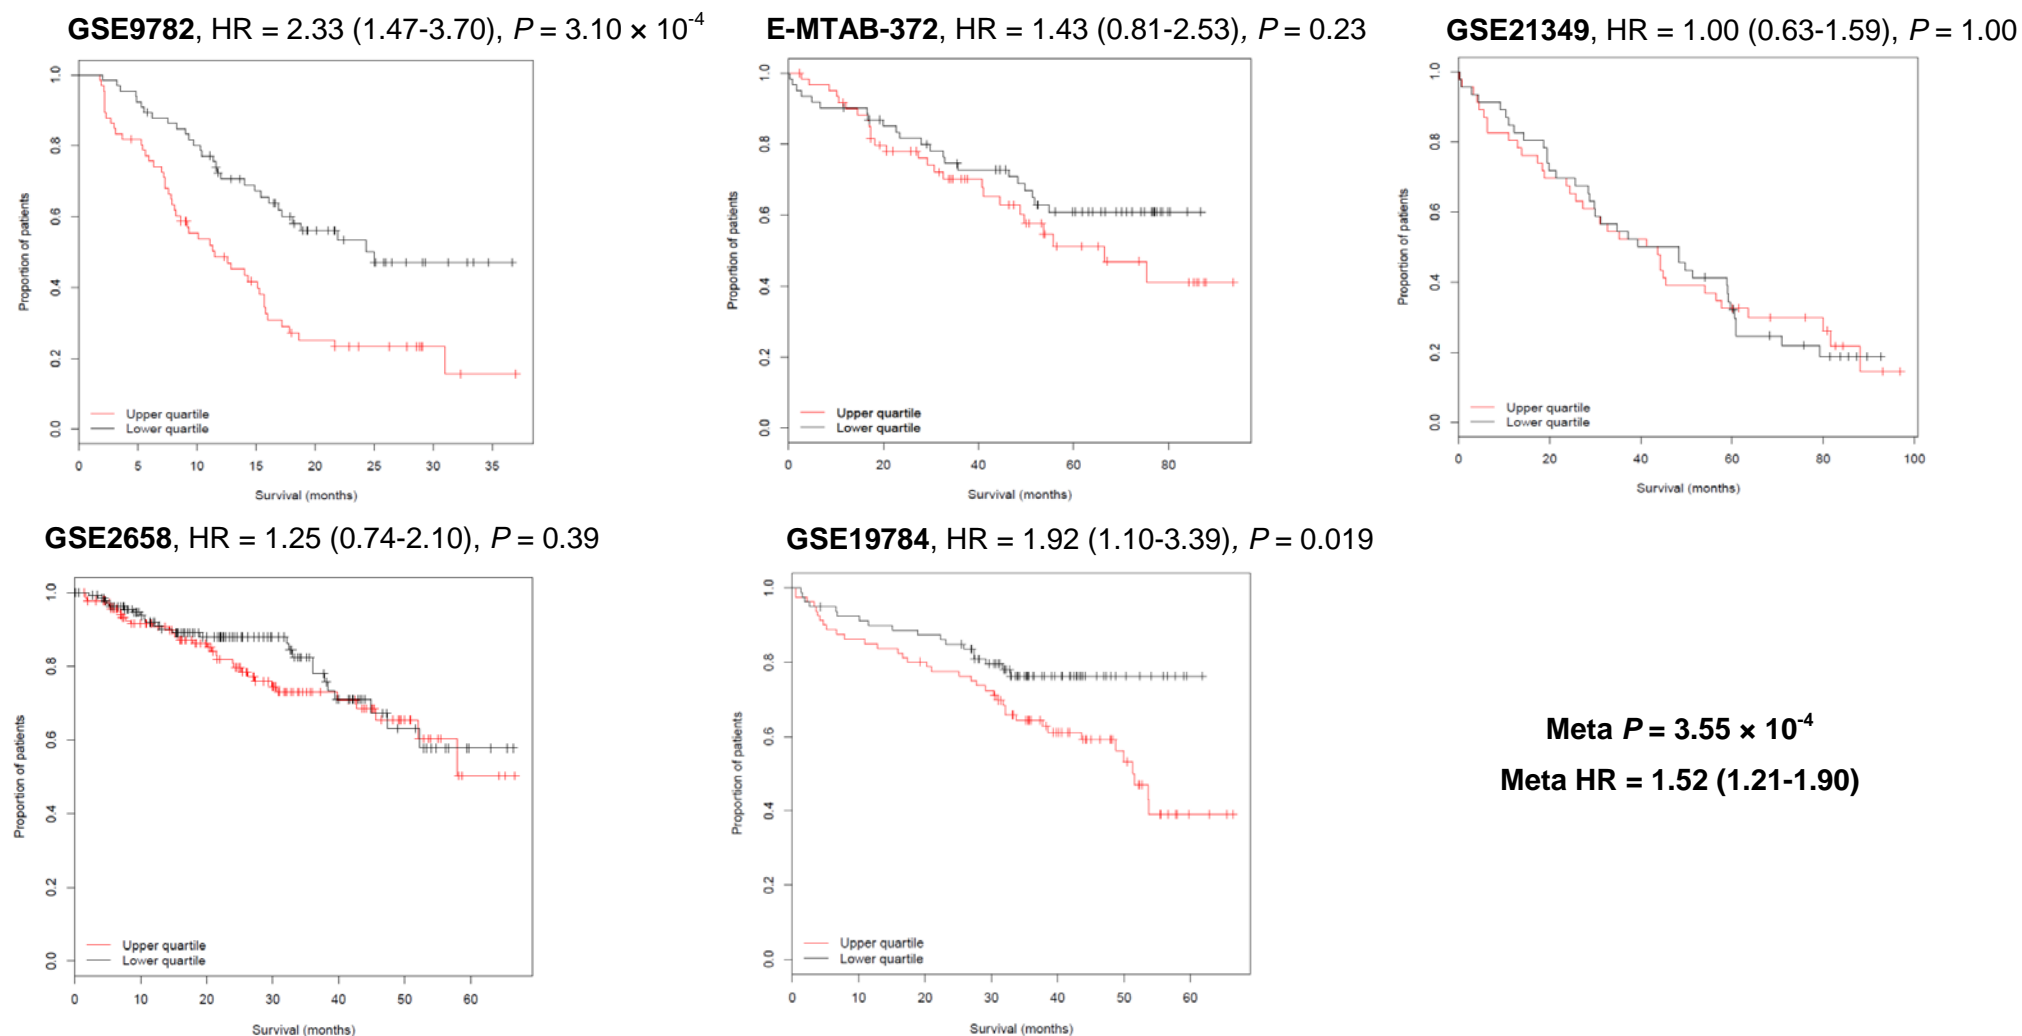

Data from: GSE9782 (n=265), GSE2658 (n=559), GSE19784 (n=320), E-MTAB-372 (n=246) and GSE21349 (n=183). Survival curves for patients with upper and lower quartile of *CDCA7L* expression shown. Vertical ticks indicate censored data points. Cox regression analysis was used to estimate expression-specific hazard ratios (HR) for each dataset with 95% confidence interval. Overall statistical significance was combined using a fixed-effects meta-analysis.

**Supplementary Table 1. eQTL analysis.**

| SNP       | Risk allele | Gene    | Probeset ID | <i>P</i> value                           | Direction |
|-----------|-------------|---------|-------------|------------------------------------------|-----------|
| rs4487645 | G           | SP4     | 6671_at     | 0.65                                     | Increase  |
|           |             | DNAH11  | 8701_at     | 0.63                                     |           |
|           |             | CDCA7L  | 55536_at    | <b><math>1.95 \times 10^{-36}</math></b> |           |
|           |             | RAPGEF5 | 9771_at     | 0.83                                     |           |
|           |             | STEAP1B | 256227_at   | 0.98                                     |           |
|           |             | IL6     | 3569_at     | 1.00                                     |           |
|           |             | TOMM7   | 54543_at    | 1.00                                     |           |

The relationship between SNP rs4487645 genotype and gene expression was assessed in CD138-selected MM plasma cells using Affymetrix Human Genome U133 2.0 Plus Array data from 183 MRC Myeloma IX trial patients, 658 Heidelberg patients and 608 US patients as recently described<sup>2,3</sup>. Association between SNP genotype and gene expression of genes was evaluated based on the significance of linear regression coefficients. cis-meQTL analysis for all genes in the 1 Mb region spanning SNP rs4487645. Probeset ID refer to Affymetrix U133 2.0 plus array custom chip definition file (CDF v.17) mapping to Entrez genes<sup>2,3</sup>. *P* value < 0.05 after adjustment for multiple testing emboldened. Direction of eQTL with respect to the risk allele of rs4487645 shown for putative association.

**Supplementary Table 2. Functional annotation of SNPs in linkage disequilibrium ( $r^2 \geq 0.8$ ) with rs4487645 on chr7.**

| SNP              | Position        | LD ( $r^2$ ) | GERP         | PhastCons   | DNase                                                                             | H3K4Me1                                                                            | H3K4Me3                                                                             | H3K27Ac                                                                             | Chromatin state             | Proteins bound  | RegulomeDB |
|------------------|-----------------|--------------|--------------|-------------|-----------------------------------------------------------------------------------|------------------------------------------------------------------------------------|-------------------------------------------------------------------------------------|-------------------------------------------------------------------------------------|-----------------------------|-----------------|------------|
| rs7785157        | 21927082        | 0.92         | 2.60         | 0.00        |                                                                                   |                                                                                    |                                                                                     |                                                                                     | Heterochromatin; low signal |                 | No Data    |
| rs57104699       | 21928079        | 0.92         | -1.65        | 0.02        |                                                                                   |                                                                                    |                                                                                     |                                                                                     | Heterochromatin; low signal |                 | 6          |
| rs6948632        | 21929452        | 0.90         | -0.67        | 0.00        |                                                                                   |                                                                                    |                                                                                     |                                                                                     | Heterochromatin; low signal |                 | 6          |
| rs75341503       | 21936698        | 0.94         | -0.16        | 0.00        |                                                                                   |                                                                                    |                                                                                     |                                                                                     | Heterochromatin; low signal |                 | No Data    |
| <b>rs4487645</b> | <b>21938240</b> | <b>1.00</b>  | <b>-4.66</b> | <b>0.00</b> | 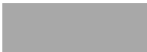 | 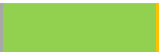 | 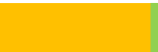 | 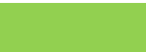 | <b>Strong enhancer</b>      | <b>IRF4,PU1</b> | <b>1b</b>  |
| rs56333627       | 21939032        | 0.89         | -8.08        | 0.00        |                                                                                   | 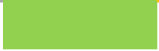 |                                                                                     |                                                                                     | Weak enhancer               |                 | No Data    |
| rs55714084       | 21939089        | 0.97         | 2.87         | 0.00        |                                                                                   |                                                                                    |                                                                                     |                                                                                     | Weak transcribed            |                 | No Data    |
| rs10659842       | 21940358        | 0.84         | -0.07        | 0.00        |                                                                                   |                                                                                    |                                                                                     |                                                                                     | Weak transcribed            |                 | No Data    |
| rs7971           | 21940960        | 0.93         | -3.27        | 0.00        |                                                                                   |                                                                                    |                                                                                     |                                                                                     | Weak transcribed            |                 | 6          |
| rs56249828       | 21944607        | 0.84         | -5.36        | 0.00        | 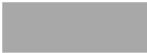 |                                                                                    |                                                                                     |                                                                                     | Transcriptional elongation  |                 | 5          |

Data are shown for rs4487645 and SNPs in linkage disequilibrium (LD) ( $r^2 \geq 0.8$  in 1000 Genomes EUR Phase 1 data) on chr7 (human genome NCBI build 37), with histone marks (H3K4Me1, H3K4Me3, H3K27Ac), DNase hypersensitivity sites and transcription factor binding from HaploReg (v4.1)<sup>4</sup> and ENCODE project data<sup>5</sup>. DNase hypersensitivity in grey and histone modifications in green for enhancer marks and orange for promoter marks in GM12878, with annotated chromatin states determined by the ChromHMM 15-state model<sup>6</sup>. Also indicated are genomic evolutionary rate profiling (GERP)<sup>7</sup>, PhastCons<sup>8</sup> and RegulomeDB (v1.1)<sup>9</sup> scores (see <http://regulome.stanford.edu/help> for score annotations). Data for rs4487645 emboldened.

**Supplementary Table 3. Clinical datasets used in this study.** Patients in this study are of HapMap Utah residents of Western and Northern European ancestry (CEU).

| Dataset accession number | Clinical trial                     | Sample size | Years of ascertainment                  | Age (Median) | Gender (% Male) | Type of MM cases           | Analysis                                                          | References    |
|--------------------------|------------------------------------|-------------|-----------------------------------------|--------------|-----------------|----------------------------|-------------------------------------------------------------------|---------------|
| GSE21349                 | MyIX                               | 491         | 11                                      | 65           | 59              | Newly diagnosed            | Expression profiling, clinical outcome                            | 10-12         |
| EGAS00001001147          | MyIX                               | 463         | 11                                      | 65           | 59              | Newly diagnosed            | Exome sequencing                                                  | 13            |
| GSE2658                  | TT2/TT3                            | 559         | TT2: 8<br>TT3: 10                       | 59           | 63              | Newly diagnosed            | Expression profiling, clinical outcome                            | 14-17         |
| GSE31161                 | TT2/TT3                            | 1038        | TT2: 8<br>TT3: 10                       | 59           | 63              | Newly diagnosed & Relapsed | Expression profiling, clinical outcome (Newly diagnosed patients) | Not available |
| GSE9782                  | APEX                               | 528         | 1                                       | 62           | 58              | Relapsed                   | Expression profiling, clinical outcome                            | 18            |
| GSE19784                 | HOVON65/<br>GMMG-HD4               | 328         | 6                                       | 57           | 60              | Newly diagnosed            | Expression profiling, clinical outcome                            | 19            |
| E-MTAB-372               | GMMG-HD3/<br>GMMG-HD4/<br>GMMG-HD5 | 280         | GMMG-HD3: 4<br>GMMG-HD4/<br>GMMG-HD5: 6 | 59           | 59              | Newly diagnosed            | Expression profiling, clinical outcome                            | 20            |
| E-MTAB-2299              | GMMG-HD3/<br>GMMG-HD4/<br>GMMG-HD5 | 665         | GMMG-HD3: 4<br>GMMG-HD4/<br>GMMG-HD5: 6 | 59           | 59              | Newly diagnosed            | Expression profiling, clinical outcome                            | 3             |

**Supplementary Table 4. Primers used in this study.**

|                                   |                                                     |
|-----------------------------------|-----------------------------------------------------|
| <b>ChIP-qPCR primers</b>          |                                                     |
| rs4487645 risk-allele F           | CTGAAACTTACAATTCAAGGTTTCACTTC                       |
| rs4487645 non-risk allele F       | CTGAAACTTACAATTCAAGGTTTCACTTA                       |
| rs4487645 R                       | GGCTAGGGACAGATGAACCTCTT                             |
| Intergenic region F <sup>21</sup> | ATGTCAGGCCCATGAACGAT                                |
| Intergenic region R <sup>21</sup> | CATTCATGGAGTCCAGGCTT                                |
| <b>3C-qPCR primers</b>            |                                                     |
| rs4487645 constant R              | GTTTCTGTGCTCCCTAGCCTCTGTGAGC                        |
| CDCA7L Promoter F                 | ACAGTAGAGCATCCTGTACATGTTCTCTTCTCG                   |
| Control region 1 F                | AGAATTCAAAATGGTGTACATGTTCTCTTCTCG                   |
| Control region 2 F                | CCAATATGCCTTTGTACATGTTCTCTTCTCG                     |
| Control region 3 F                | GAGCAATTGTAAGTGGTACATGTTCTCTTCTCG                   |
| Control region 4 F                | ATGAAACAACATTAATGGTACATGTTCTCTTCTCG                 |
| Intersite control F               | GTCAGGCCCATGAACGATAAAAGGG                           |
| Intersite control R               | GGTAAGCAGATGATGATGAGCAGGCA                          |
| <b>Plasmid construct primers</b>  |                                                     |
| CDCA7L amplicon F                 | CCTACCTGATCCCTTCTAAGTC                              |
| CDCA7L amplicon R                 | AGCCTCTTCATGCTATGTGGT                               |
| SDM F                             | GAAACTTACAATTCAAGGTTTCACTTATCTCTTAATTTTATCGAAGAGGTT |
| SDM R                             | AACCTCTTCGATAAAATTAAGAGATAAGTGAAACCTTGAATTGTAAGTTTC |
| Sequencing F                      | CCTACCTGATCCCTTCTAAGTCA                             |
| Sequencing R                      | ACAGGGTGTCTGAGGACCAG                                |
| <b>siRNA oligos</b>               |                                                     |
| IRF4 siRNA Sense                  | CAGCUAGACUAUUGGGUAUdTdT                             |
| IRF4 siRNA Antisense              | AUACCCAAUAGUCUAGCUGGG                               |
| NC siRNA Sense                    | UGGUUUACAUGUCGACUAAdTdT                             |
| NC siRNA Antisense                | UUAGUCGACAUGUAAACCAdTdT                             |
| <b>qPCR primers</b>               |                                                     |
| IRF4 F                            | AAATCCCGTACCAATGTCCC                                |
| IRF4 R                            | GGGGCACAAGCATAAAAGGT                                |
| CDCA7L F                          | GATGTCAGATCGGCATTGCT                                |
| CDCA7L R                          | TGAATGAGGATTCTGTGGC                                 |
| GAPDH F                           | GAAGGTGAAGGTCGGAGTC                                 |
| GAPDH R                           | GAAGATGGTGATGGGATTTC                                |

## SUPPLEMENTARY REFERENCES

1. Meissner, T. *et al.* Gene expression profiling in multiple myeloma--reporting of entities, risk, and targets in clinical routine. *Clin Cancer Res* 17, 7240-7 (2011).
2. Mitchell, J.S. *et al.* Genome-wide association study identifies multiple susceptibility loci for multiple myeloma. *Nat Commun* 7, 12050 (2016).
3. Weinhold, N. *et al.* The 7p15.3 (rs4487645) association for multiple myeloma shows strong allele-specific regulation of the MYC-interacting gene CDCA7L in malignant plasma cells. *Haematologica* 100, e110-3 (2015).
4. Ward, L.D. & Kellis, M. HaploReg: a resource for exploring chromatin states, conservation, and regulatory motif alterations within sets of genetically linked variants. *Nucleic Acids Res* 40, D930-4 (2012).
5. An integrated encyclopedia of DNA elements in the human genome. *Nature* 489, 57-74 (2012).
6. Ernst, J. & Kellis, M. ChromHMM: automating chromatin-state discovery and characterization. *Nat Methods* 9, 215-6 (2012).
7. Cooper, G.M. *et al.* Distribution and intensity of constraint in mammalian genomic sequence. *Genome Res* 15, 901-13 (2005).
8. Siepel, A. *et al.* Evolutionarily conserved elements in vertebrate, insect, worm, and yeast genomes. *Genome Res* 15, 1034-50 (2005).
9. Boyle, A.P. *et al.* Annotation of functional variation in personal genomes using RegulomeDB. *Genome Res* 22, 1790-7 (2012).
10. Walker, B.A. *et al.* Aberrant global methylation patterns affect the molecular pathogenesis and prognosis of multiple myeloma. *Blood* 117, 553-62 (2011).
11. Walker, B.A. *et al.* A compendium of myeloma-associated chromosomal copy number abnormalities and their prognostic value. *Blood* 116, e56-65 (2010).
12. Walker, B.A. *et al.* Intracлонаl heterogeneity and distinct molecular mechanisms characterize the development of t(4;14) and t(11;14) myeloma. *Blood* 120, 1077-86 (2012).
13. Walker, B.A. *et al.* APOBEC family mutational signatures are associated with poor prognosis translocations in multiple myeloma. *Nat Commun* 6, 6997 (2015).
14. Hanamura, I., Huang, Y., Zhan, F., Barlogie, B. & Shaughnessy, J. Prognostic value of cyclin D2 mRNA expression in newly diagnosed multiple myeloma treated with high-dose chemotherapy and tandem autologous stem cell transplantations. *Leukemia* 20, 1288-90 (2006).
15. Zhan, F. *et al.* The molecular classification of multiple myeloma. *Blood* 108, 2020-8 (2006).
16. Zhan, F. *et al.* Gene-expression signature of benign monoclonal gammopathy evident in multiple myeloma is linked to good prognosis. *Blood* 109, 1692-700 (2007).
17. Chen, L. *et al.* Identification of early growth response protein 1 (EGR-1) as a novel target for JUN-induced apoptosis in multiple myeloma. *Blood* 115, 61-70 (2010).
18. Mulligan, G. *et al.* Gene expression profiling and correlation with outcome in clinical trials of the proteasome inhibitor bortezomib. *Blood* 109, 3177-88 (2007).
19. Broyl, A. *et al.* Gene expression profiling for molecular classification of multiple myeloma in newly diagnosed patients. *Blood* 116, 2543-53 (2010).
20. Moreaux, J. *et al.* Development of gene expression-based score to predict sensitivity of multiple myeloma cells to DNA methylation inhibitors. *Mol Cancer Ther* 11, 2685-92 (2012).
21. Mendillo, M.L. *et al.* HSF1 drives a transcriptional program distinct from heat shock to support highly malignant human cancers. *Cell* 150, 549-62 (2012).
